# Supplementary material for: Identification of Markers Associated with Yield Traits and Morphological Features in Maize (Zea mays L.)
Source: PubMed Central journal article supplement (PMC6783969; doi:10.3390/plants8090330), 2019-09-05
Supplement: plants-08-00330-s001.pdf [file plants-08-00330-s001.pdf]

|     |           |         |      |      |       |       |       |       |       |       |       |        |        |
|-----|-----------|---------|------|------|-------|-------|-------|-------|-------|-------|-------|--------|--------|
| SNP | 2457095   | 12: G>T | 0.51 | 0.49 |       |       | 1.84  |       |       | 14.69 | 9.13  |        |        |
| SNP | 2429301   | 62: G>C | 0.58 | 0.42 | 0.53  | 0.77  | 1.72  |       |       |       |       |        |        |
| SNP | 4582630   | 40: G>A | 0.69 | 0.31 |       |       |       | 1.09  | -0.82 | 0.93  |       |        |        |
| SNP | 2435775   | 32: C>T | 0.53 | 0.47 |       |       |       |       |       |       |       | 18.41  | 13.86  |
| SNP | 4582418   | 47: A>G | 0.59 | 0.41 |       |       |       |       |       |       |       | -11.46 | -8.51  |
| SNP | 2526788   | 25: C>A | 0.73 | 0.27 |       |       |       |       |       | 19.02 |       | 1.27   |        |
| SNP | 4771078   | 54: G>A | 0.63 | 0.37 |       |       | 1.29  | -0.75 |       |       |       |        |        |
| SNP | 2379065   | 43: T>C | 0.51 | 0.49 |       |       |       |       | 0.82  |       |       | 0.91   |        |
| SNP | 2426266   | 50: T>C | 0.54 | 0.46 |       |       |       |       |       | 14.83 | 8.76  |        |        |
| SNP | 4583437   | 30: G>C | 0.56 | 0.44 |       |       | 1.13  |       | -0.74 |       |       |        |        |
| SNP | 4593266   | 24: A>G | 0.72 | 0.28 |       |       | -2.64 | -2.98 | 0.73  |       |       |        |        |
| SNP | 9710852   | 60: T>C | 0.70 | 0.30 |       |       | -2.56 | -3.22 | 1.24  |       |       | -0.16  |        |
| SNP | 2395244   | 7: C>G  | 0.60 | 0.40 | 0.49  | 0.92  |       |       |       |       |       |        |        |
| SNP | 4576631   | 22: G>C | 0.59 | 0.41 | 0.49  | 1.95  | 1.67  |       |       |       |       |        |        |
| SNP | 4770164   | 18: A>G | 0.71 | 0.29 |       | -1.05 | -2.33 |       |       |       |       |        |        |
| SNP | 2509909   | 57: C>T | 0.52 | 0.48 |       |       |       | 0.77  | 0.84  |       |       |        |        |
| SNP | 4772780   | 19: T>C | 0.59 | 0.41 |       |       | 1.89  | 1.89  |       |       |       | 0.69   |        |
| SNP | 4593510   | 13: G>T | 0.66 | 0.34 | 0.50  | 0.84  |       |       |       |       |       |        |        |
| SNP | 4593789   | 12: G>T | 0.57 | 0.43 |       |       |       | -0.82 |       |       | 8.86  |        |        |
| SNP | 4590061   | 61: C>G | 0.66 | 0.34 |       |       | 1.15  |       | -0.78 |       |       |        |        |
| SNP | 4575906   | 27: A>C | 0.56 | 0.44 |       |       | -0.94 |       | 0.65  |       |       |        |        |
| SNP | 4584241   | 61: A>G | 0.71 | 0.29 |       |       | 1.87  |       |       |       |       | 0.19   |        |
| SNP | 2429645   | 31: G>A | 0.64 | 0.36 |       | 0.70  |       | 0.74  |       |       |       |        |        |
| SNP | 4766586   | 35: C>A | 0.69 | 0.31 | 0.60  |       | 1.85  |       |       |       |       | 0.19   |        |
| SNP | 4765276   | 17: G>C | 0.61 | 0.39 |       |       | 1.70  | 2.03  |       | 0.67  |       | 0.89   |        |
| SNP | 4577076   | 30: C>A | 0.51 | 0.49 |       |       |       |       |       |       |       | -0.86  | -8.20  |
| SNP | 4772822   | 33: T>G | 0.56 | 0.44 |       |       |       |       |       |       |       | 10.27  | 8.67   |
| SNP | 4581735   | 7: A>T  | 0.56 | 0.44 | -0.49 | -0.66 |       |       |       |       |       |        |        |
| SNP | 4772346   | 5: C>T  | 0.53 | 0.47 |       |       | 1.51  |       |       |       | 8.11  | 0.15   |        |
| SNP | 4768034   | 20: T>G | 0.54 | 0.46 |       |       | 1.42  | 2.27  |       |       |       |        |        |
| SNP | 7061083   | 10: T>C | 0.58 | 0.42 |       |       |       |       |       |       |       | 13.31  | 11.17  |
| SNP | 9704516   | 20: C>A | 0.52 | 0.48 |       |       | -1.87 | -1.54 | 1.10  |       |       |        |        |
| SNP | 4582139   | 29: G>A | 0.61 | 0.39 |       |       | 1.81  |       |       |       |       | -0.94  |        |
| SNP | 4764143   | 27: G>A | 0.53 | 0.47 |       |       |       |       |       |       |       | 12.17  | 9.19   |
| SNP | 4772190   | 18: A>G | 0.58 | 0.42 |       |       |       |       |       |       |       | -10.53 | 2.03   |
| SNP | 100027248 | 7: A>G  | 0.51 | 0.49 |       | 0.86  |       | -1.08 |       |       |       |        |        |
| SNP | 4591311   | 8: A>T  | 0.69 | 0.31 |       |       |       | 1.01  | -0.83 |       |       |        |        |
| SNP | 4777014   | 14: C>T | 0.55 | 0.45 |       |       |       |       |       |       | -0.14 | -0.71  |        |
| SNP | 4576829   | 13: G>A | 0.61 | 0.39 |       |       | 1.62  | 2.17  |       |       |       |        |        |
| SNP | 4770814   | 28: T>G | 0.61 | 0.39 | 0.59  |       |       |       |       |       | 0.16  |        |        |
| SNP | 2391444   | 26: T>C | 0.60 | 0.40 |       |       | -1.58 |       |       |       |       |        | -10.35 |
